# Supplementary material for: miR-34a expression in human breast cancer is associated with drug resistance
Source: PubMed Central journal article supplement (PMC5739732; doi:10.18632/oncotarget.22286), 2017-11-06
Supplement: oncotarget-08-106270-s001.pdf [file oncotarget-08-106270-s001.pdf]

## miR-34a expression in human breast cancer is associated with drug resistance

### SUPPLEMENTARY MATERIALS

#### Structural and synthesis information of miR-34a and NC-RNA mimics

miR-34a mimic and negative control mimic (NC-RNA mimic) were synthesized and purified by the GenePharma Company (Shanghai, China). The sequence of miR-34a mimics is 5'-UGGCAGUGUCUUA GCUGGUUGU- 3'. The sequence of NC-RNA mimics is 5'-FAM-UUCUCCGAACGUGUCACGUTT-3'.

#### Design and synthesis of shRNA targeting MDR1

To test whether the regulation of miR-34a in breast cancer cells was directly related to MDR1, we knocked down the MDR1 using shRNA. The sequence of MDR1 hairpin siRNA is 5'-GTATTGACAGCTATTCGAAGAGT GGGCAttcaagaga TGCCCACTCTTCGAATAGCTGTC AATACTtt-ttt-3', which were designed and synthesized by Forevergen Biosciences (Guangzhou, China). MDR1 shRNAs were transfected into MDR-MCF-7 cells using Lipofectamine 2000 (Invitrogen, CA, USA), according to the manufacturer's instructions.

Then the expression of miR-34a was detected in MDR1 shRNA group and control group.

#### Association between miR-34a expression and clinicopathological characteristics of breast cancer

We detected the expression of miR-34a in 113 cases of breast cancer tissue samples by qRT-PCR. The expression levels of miR-34a in breast cancer were categorized as low or high expression at the cut-off value of the median.

We additionally investigated the association between miR-34a expression and clinicopathological features of breast cancer including menstrual status, histological grade, clinical stage, lymph node metastasis status, ER status and PR status in a univariate  $\chi^2$  test. As shown in Supplementary Table 1, no significant differences were observed between miR-34a expression and menstrual status, histological grade, clinical stage, ER status and PR status of breast cancer ( $P > 0.05$ ). However, miR34a expression was significantly associated with lymph node metastasis status ( $P = 0.003$ ).

**Supplementary Table 1: Association between miR-34a expression and clinicopathological characteristics of breast cancer**

| Clinical index             | case ( <i>n</i> = 113) | miR-34a expression |            | $\chi^2$ | <i>P</i> |
|----------------------------|------------------------|--------------------|------------|----------|----------|
|                            |                        | high               | low        |          |          |
| menopausal status          |                        |                    |            |          |          |
| Pre-menopausal             | 69                     | 33 (60.0%)         | 36 (62.1%) | 0.051    | 0.822    |
| Post menopausal            | 44                     | 22 (40.0%)         | 22 (37.9%) |          |          |
| Histologic type            |                        |                    |            |          |          |
| Special type               | 35                     | 18 (32.7%)         | 17 (29.3%) | 0.154    | 0.695    |
| Non special type           | 78                     | 37 (67.3%)         | 41 (60.7%) |          |          |
| Axillary lymph node status |                        |                    |            |          |          |
| Metastasis                 | 55                     | 19 (34.5%)         | 36 (62.1%) | 8.56     | 0.003    |
| No                         | 58                     | 36 (65.5%)         | 22 (37.9%) |          |          |
| PTNM                       |                        |                    |            |          |          |
| Stage I+II                 | 82                     | 38 (69.1%)         | 44 (75.9%) | 0.650    | 0.42     |
| Stage III                  | 31                     | 17 (30.9%)         | 14 (24.1%) |          |          |
| ER                         |                        |                    |            |          |          |
| negative                   | 40                     | 22 (40.0%)         | 18 (31.0%) | 0.992    | 0.319    |
| positive                   | 73                     | 33 (60.0%)         | 40 (69.0%) |          |          |
| PR                         |                        |                    |            |          |          |
| negative                   | 47                     | 21 (38.2%)         | 26 (44.8%) | 0.513    | 0.474    |
| positive                   | 66                     | 34 (61.8%)         | 32 (55.2%) |          |          |

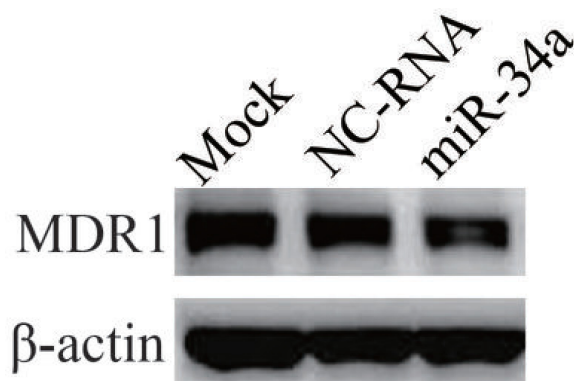

**Supplementary Figure 1: miR-34a effect on the drug-resistance changes of MDR-MCF-7 cells.** miR-34a decrease the expression of MDR1 protein in MDR-MCF-7 compared with NC-RNA.

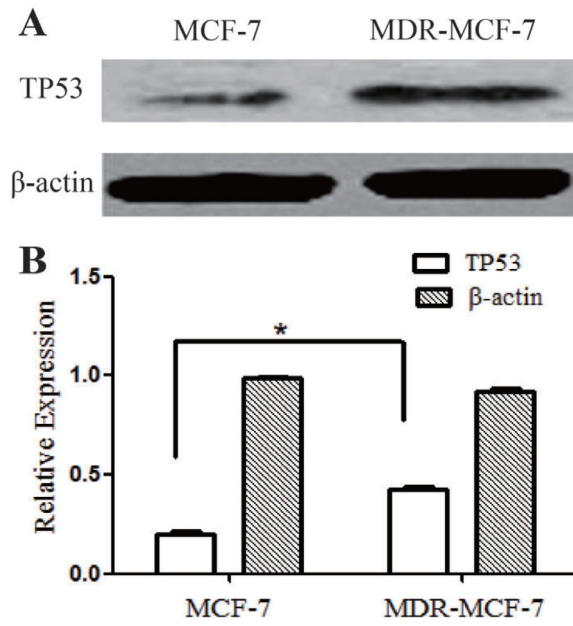

**Supplementary Figure 2: TP53 expression in breast cancer cells.** (A–B) TP53 protein was higher expressed in MDR-MCF7 cells compared with its Parental MCF-7 cells.
